# Supplementary material for: Changes in the Red Sea overturning circulation during Marine Isotope Stage 3
Source: Copernicus journal article supplement (doi:10.5194/cp-20-267-2024), 2024-02-02

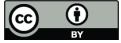

*Supplement of*

## **Changes in the Red Sea overturning circulation during Marine Isotope Stage 3**

**Raphaël Hubert-Huard et al.**

*Correspondence to:* Raphaël Hubert-Huard ([raphael.hubert-huard@uni-hamburg.de](mailto:raphael.hubert-huard@uni-hamburg.de))

The copyright of individual parts of the supplement might differ from the article licence.

## Supplement

### Supplement 1

**Table S1** Oxygen and carbon stable isotope data set used for establishing the epibenthic foraminifera composite isotope record of the KL11 core.

| Mean depth<br>(cm) | Age<br>(ka B.P.) | $\delta^{18}\text{O}$<br><i>Cibicides mabahethi</i><br>(‰ VPDB) | $\delta^{18}\text{O}$<br><i>Discorbinella bertheloti</i> s.l.<br>(‰ VPDB) | $\delta^{18}\text{O}$<br><i>Hanzawaia boueana</i> s.l.<br>(‰ VPDB) | $\delta^{18}\text{O}$<br>Composite<br>(‰ VPDB) | $\delta^{13}\text{C}$<br><i>Cibicides mabahethi</i><br>(‰ VPDB) | $\delta^{13}\text{C}$<br><i>Discorbinella bertheloti</i> s.l.<br>(‰ VPDB) | $\delta^{13}\text{C}$<br><i>Hanzawaia boueana</i> s.l.<br>(‰ VPDB) | $\delta^{13}\text{C}$<br>Composite<br>(‰ VPDB) |
|--------------------|------------------|-----------------------------------------------------------------|---------------------------------------------------------------------------|--------------------------------------------------------------------|------------------------------------------------|-----------------------------------------------------------------|---------------------------------------------------------------------------|--------------------------------------------------------------------|------------------------------------------------|
| 194.5              | 28.44            | 4.199                                                           |                                                                           |                                                                    | 4.199                                          | 1.603                                                           |                                                                           |                                                                    | 1.603                                          |
| 196.5              | 28.78            | 4.231                                                           | 4.412                                                                     |                                                                    | 4.225                                          | 1.862                                                           | 1.871                                                                     |                                                                    | 1.821                                          |
| 198.5              | 29.12            | 4.156                                                           | 3.753                                                                     | 4.010                                                              | 3.914                                          | 1.674                                                           | 1.342                                                                     | 1.492                                                              | 1.529                                          |
| 200.5              | 29.46            | 4.016                                                           | 4.735                                                                     | 3.778                                                              | 4.118                                          | 1.572                                                           | 2.144                                                                     | 1.320                                                              | 1.705                                          |
| 202.5              | 29.8             | 3.847                                                           |                                                                           | 3.824                                                              | 3.844                                          | 1.605                                                           |                                                                           | 1.278                                                              | 1.527                                          |
| 204.5              | 30.14            | 3.801                                                           | 4.356                                                                     | 3.786                                                              | 3.922                                          | 1.413                                                           | 1.899                                                                     | 1.436                                                              | 1.609                                          |
| 206.5              | 30.49            | 3.900                                                           | 3.684                                                                     | 3.858                                                              | 3.755                                          | 1.525                                                           | 1.454                                                                     | 1.367                                                              | 1.475                                          |
| 208.5              | 30.83            | 3.622                                                           | 3.604                                                                     | 3.810                                                              | 3.620                                          | 1.445                                                           | 1.360                                                                     | 1.339                                                              | 1.408                                          |
| 210.5              | 31.17            | 3.760                                                           | 4.167                                                                     |                                                                    | 3.867                                          | 1.383                                                           | 1.728                                                                     |                                                                    | 1.510                                          |
| 212.5              | 31.51            | 3.295                                                           |                                                                           |                                                                    | 3.295                                          | 1.164                                                           |                                                                           |                                                                    | 1.164                                          |
| 214.5              | 31.85            | 3.756                                                           | 3.797                                                                     |                                                                    | 3.680                                          | 1.515                                                           | 1.517                                                                     |                                                                    | 1.470                                          |
| 216.5              | 32.19            | 3.745                                                           | 3.943                                                                     | 3.571                                                              | 3.694                                          | 1.457                                                           | 1.598                                                                     | 1.283                                                              | 1.472                                          |
| 218.5              | 32.53            | 3.398                                                           | 3.516                                                                     | 3.323                                                              | 3.354                                          | 1.190                                                           | 1.055                                                                     | 0.948                                                              | 1.091                                          |
| 220.5              | 32.88            | 3.211                                                           | 3.647                                                                     | 3.021                                                              | 3.234                                          | 1.064                                                           | 1.421                                                                     | 0.715                                                              | 1.093                                          |
| 222.5              | 33.22            | 3.650                                                           | 3.611                                                                     | 3.459                                                              | 3.515                                          | 1.440                                                           | 1.285                                                                     | 0.969                                                              | 1.258                                          |
| 224.5              | 33.56            | 3.613                                                           | 4.182                                                                     | 3.627                                                              | 3.749                                          | 1.389                                                           | 1.892                                                                     | 1.197                                                              | 1.519                                          |
| 226.5              | 33.9             | 3.274                                                           | 3.905                                                                     | 3.470                                                              | 3.491                                          | 1.014                                                           | 1.685                                                                     | 0.954                                                              | 1.244                                          |
| 228.5              | 34.24            | 3.449                                                           | 3.695                                                                     |                                                                    | 3.475                                          | 1.355                                                           | 1.385                                                                     |                                                                    | 1.324                                          |
| 230.5              | 34.58            | 2.747                                                           | 3.109                                                                     |                                                                    | 2.831                                          | 1.166                                                           | 1.258                                                                     |                                                                    | 1.166                                          |
| 232.5              | 34.93            | 2.852                                                           |                                                                           |                                                                    | 2.852                                          | 1.061                                                           |                                                                           |                                                                    | 1.061                                          |
| 233.5              | 35.1             | 3.286                                                           | 3.034                                                                     | 3.061                                                              | 3.068                                          | 1.330                                                           | 1.182                                                                     | 0.996                                                              | 1.196                                          |
| 234.5              | 35.27            | 3.635                                                           | 3.773                                                                     | 2.898                                                              | 3.377                                          | 1.394                                                           | 1.539                                                                     | 1.076                                                              | 1.363                                          |
| 236.5              | 35.61            | 3.317                                                           | 3.831                                                                     | 3.332                                                              | 3.435                                          | 1.186                                                           | 1.628                                                                     | 1.280                                                              | 1.391                                          |
| 238.5              | 35.95            | 3.402                                                           | 3.610                                                                     | 3.631                                                              | 3.489                                          | 1.433                                                           | 1.503                                                                     | 1.188                                                              | 1.401                                          |
| 240.5              | 36.29            | 3.503                                                           | 3.629                                                                     | 3.287                                                              | 3.414                                          | 1.478                                                           | 1.540                                                                     | 1.140                                                              | 1.412                                          |
| 242.5              | 36.63            | 3.078                                                           |                                                                           | 3.201                                                              | 3.148                                          | 1.281                                                           |                                                                           | 1.195                                                              | 1.323                                          |
| 244.5              | 36.98            | 2.680                                                           | 2.952                                                                     | 2.769                                                              | 2.742                                          | 1.007                                                           | 1.371                                                                     | 0.998                                                              | 1.152                                          |
| 246.5              | 37.32            | 2.579                                                           | 2.501                                                                     | 2.848                                                              | 2.584                                          | 0.981                                                           | 0.884                                                                     | 1.024                                                              | 0.989                                          |
| 248.5              | 37.66            | 2.556                                                           | 3.190                                                                     | 2.847                                                              | 2.806                                          | 1.024                                                           | 1.442                                                                     | 0.995                                                              | 1.180                                          |
| 249.5              | 37.83            | 2.440                                                           | 2.535                                                                     | 2.498                                                              | 2.432                                          | 1.086                                                           | 1.047                                                                     | 0.864                                                              | 1.025                                          |
| 250.5              | 38               |                                                                 |                                                                           | 2.580                                                              | 2.597                                          |                                                                 |                                                                           | 0.787                                                              | 0.958                                          |

|       |       |       |       |       |       |       |       |       |       |
|-------|-------|-------|-------|-------|-------|-------|-------|-------|-------|
| 252.5 | 38.38 | 2.729 |       | 2.636 | 2.691 | 1.122 |       | 0.82  | 1.056 |
| 254.5 | 38.77 | 3.921 |       |       | 3.921 | 1.608 |       |       | 1.608 |
| 256.5 | 39.15 | 3.645 | 3.998 |       | 3.725 | 1.313 | 1.890 |       | 1.556 |
| 258.5 | 39.54 |       | 3.885 |       | 3.692 |       | 1.540 |       | 1.449 |
| 260.5 | 39.92 | 3.385 | 3.955 |       | 3.573 | 1.581 | 1.853 |       | 1.671 |
| 262.5 | 40.31 | 3.524 | 3.993 |       | 3.662 | 1.455 | 1.643 |       | 1.503 |
| 264.5 | 40.69 |       | 3.357 |       | 3.164 |       | 1.169 |       | 1.078 |
| 266.5 | 41.07 |       | 3.539 |       | 3.346 |       | 1.541 |       | 1.450 |
| 268.5 | 41.46 | 3.000 |       |       | 3.000 | 0.99  |       |       | 0.99  |
| 272.5 | 42.23 | 3.284 | 3.765 | 3.888 | 3.587 | 1.602 | 1.597 | 1.957 | 1.745 |
| 276.5 | 42.99 | 2.755 | 3.207 | 2.268 | 2.685 | 1.244 | 1.457 | 0.681 | 1.154 |
| 278.5 | 43.38 | 2.590 | 1.638 | 2.605 | 2.219 | 1.255 | 0.433 | 1.158 | 0.975 |
| 280.5 | 43.74 | 3.213 | 3.023 | 3.263 | 3.108 | 1.428 | 1.506 | 1.334 | 1.449 |
| 282.5 | 44.1  | 3.397 | 3.375 |       | 3.289 | 1.688 | 1.522 |       | 1.559 |
| 284.5 | 44.47 |       | 3.217 |       | 3.024 |       | 1.642 |       | 1.551 |
| 286.5 | 44.83 | 2.705 | 2.717 | 2.727 | 2.658 | 1.383 | 1.338 | 1.186 | 1.329 |
| 288.5 | 45.19 | 2.610 | 2.997 | 2.264 | 2.565 | 1.309 | 1.331 | 0.669 | 1.129 |
| 290.5 | 45.55 | 2.452 | 2.827 | 2.652 | 2.585 | 1.265 | 1.607 | 1.095 | 1.349 |
| 292.5 | 45.92 | 2.045 | 2.355 | 2.292 | 2.172 | 0.973 | 0.908 | 1.046 | 1.002 |
| 293.5 | 46.09 | 2.162 | 2.582 | 2.152 | 2.240 | 0.922 | 1.339 | 0.946 | 1.095 |
| 295.5 | 46.44 |       | 2.553 |       | 2.360 |       | 0.949 |       | 0.858 |
| 297.5 | 46.79 | 3.553 |       |       | 3.553 | 1.524 |       |       | 1.524 |
| 299.5 | 47.13 |       | 4.043 |       | 3.850 |       | 2.003 |       | 1.912 |
| 301.5 | 47.48 |       | 3.094 |       | 2.901 |       | 1.258 |       | 1.167 |
| 303.5 | 47.82 |       | 2.875 |       | 2.682 |       | 1.465 |       | 1.374 |
| 305.5 | 48.17 |       |       | 2.758 | 2.775 |       |       | 0.989 | 1.160 |
| 307.5 | 48.52 |       | 3.402 |       | 3.209 |       | 1.753 |       | 1.662 |
| 309.5 | 48.86 | 2.702 |       |       | 2.702 | 1.361 |       |       | 1.361 |
| 311.5 | 49.21 | 2.643 |       | 2.437 | 2.549 | 1.260 |       | 1.013 | 1.222 |
| 313.5 | 49.55 | 2.558 |       |       | 2.558 | 1.290 |       |       | 1.290 |
| 315.5 | 49.9  | 2.536 | 2.767 | 2.221 | 2.449 | 1.260 | 1.328 | 0.888 | 1.185 |
| 317.5 | 50.25 | 2.416 |       | 2.491 | 2.462 | 1.195 |       | 1.126 | 1.246 |
| 319.5 | 50.59 | 2.136 |       | 2.437 | 2.295 | 1.095 |       | 1.083 | 1.174 |
| 321.5 | 50.94 | 2.228 |       |       | 2.228 | 1.056 |       |       | 1.056 |
| 323.5 | 51.29 | 2.230 | 2.336 |       | 2.186 | 1.182 | 1.248 |       | 1.169 |
| 325.5 | 51.63 | 2.442 |       |       | 2.442 | 0.923 |       |       | 0.923 |
| 326.5 | 51.8  | 1.997 | 2.729 | 2.127 | 2.226 | 0.857 | 1.102 | 0.992 | 1.010 |
| 326.5 | 51.8  | 2.159 | 2.693 |       | 2.329 | 1.097 | 1.305 |       | 1.155 |
| 327.5 | 51.98 | 2.354 | 2.661 |       | 2.411 | 0.985 | 1.054 |       | 0.974 |
| 329.5 | 52.32 | 2.990 | 3.257 |       | 3.027 | 1.192 | 1.193 |       | 1.147 |
| 331.5 | 52.67 | 3.305 | 3.349 |       | 3.230 | 1.153 | 1.296 |       | 1.179 |
| 334   | 53.07 | 2.864 | 3.062 |       | 2.866 | 1.123 | 1.113 |       | 1.072 |
| 335.5 | 53.31 | 2.561 | 2.846 |       | 2.607 | 1.082 | 1.055 |       | 1.023 |
| 337.5 | 53.63 | 2.632 | 2.682 |       | 2.560 | 1.023 | 1.079 |       | 1.005 |
| 339.5 | 53.95 | 2.903 | 2.822 | 2.899 | 2.816 | 1.144 | 0.992 | 0.905 | 1.040 |
| 341.5 | 54.27 | 2.961 | 3.359 | 2.969 | 3.038 | 1.209 | 1.148 | 0.913 | 1.116 |
| 343.5 | 54.59 |       | 3.146 | 2.851 | 2.911 |       | 1.305 | 0.892 | 1.138 |

|       |       |       |       |       |       |       |       |       |       |
|-------|-------|-------|-------|-------|-------|-------|-------|-------|-------|
| 345.5 | 54.91 | 2.627 | 2.825 | 2.553 | 2.610 | 1.040 | 1.163 | 0.858 | 1.047 |
| 347.5 | 55.23 |       | 2.448 | 2.621 | 2.447 |       | 0.764 | 1.106 | 0.975 |
| 349.5 | 55.55 |       | 2.805 |       | 2.612 |       | 1.202 |       | 1.111 |
| 351.5 | 55.87 |       | 2.597 | 2.386 | 2.404 |       | 1.086 | 0.766 | 0.966 |
| 353.5 | 56.19 |       | 3.395 |       | 3.202 |       | 1.007 |       | 0.916 |
| 355.5 | 56.51 |       | 3.198 | 3.224 | 3.123 |       | 1.017 | 0.838 | 0.967 |
| 357.5 | 56.83 |       | 2.868 |       | 2.675 |       | 0.837 |       | 0.746 |
| 358.5 | 56.99 |       | 2.878 |       | 2.685 |       | 0.885 |       | 0.794 |
| 359.5 | 57.15 |       | 3.374 |       | 3.181 |       | 0.947 |       | 0.856 |
| 361.5 | 57.47 |       | 3.249 |       | 3.056 |       | 0.991 |       | 0.9   |
| 363.5 | 57.79 |       | 3.237 |       | 3.044 |       | 0.67  |       | 0.579 |
| 364.5 | 57.95 | 3.389 | 3.549 |       | 3.372 | 1.026 | 0.96  |       | 0.947 |
| 365.5 | 58.11 | 3.629 | 3.674 |       | 3.555 | 0.944 | 1.119 |       | 0.986 |
| 367.5 | 58.43 | 3.694 | 3.578 |       | 3.539 | 1.206 | 1.040 |       | 1.077 |
| 369.5 | 58.75 | 3.712 | 3.657 |       | 3.588 | 1.173 | 1.176 |       | 1.129 |
| 371.5 | 59.07 |       | 3.577 |       | 3.384 |       | 1.075 |       | 0.984 |
| 373.5 | 59.39 | 3.748 | 3.716 |       | 3.635 | 1.267 | 1.229 |       | 1.202 |
| 375.5 | 59.71 | 3.870 | 3.799 |       | 3.738 | 1.319 | 1.209 |       | 1.218 |
| 377.5 | 60.04 | 3.762 | 3.720 |       | 3.644 | 1.199 | 1.257 |       | 1.182 |
| 379.5 | 60.36 | 3.727 | 3.941 |       | 3.737 | 1.301 | 1.465 |       | 1.337 |
| 381.5 | 60.68 | 3.895 |       |       | 3.895 | 1.378 |       |       | 1.378 |
| 383.5 | 61    | 3.815 | 3.918 |       | 3.770 | 1.379 | 1.460 |       | 1.374 |
| 385.5 | 61.32 |       | 4.294 |       | 4.101 |       | 1.801 |       | 1.710 |
| 387.5 | 61.64 |       | 3.710 |       | 3.517 |       | 1.417 |       | 1.326 |
| 389.5 | 61.96 |       | 3.871 |       | 3.678 |       | 1.572 |       | 1.481 |
| 390.5 | 62.12 |       | 3.850 |       | 3.657 |       | 1.543 |       | 1.452 |

---

**Table S2** Stable carbon isotope data of *Globigerinoides ruber* white for core GeoB5844-2.

| Mean depth<br>(cm) | Age<br>(ka B.P.) | $\delta^{13}\text{C}$<br><i>Globigerinoides ruber</i> white<br>(‰ VPDB) |
|--------------------|------------------|-------------------------------------------------------------------------|
| 0.5                | 0.58             | 1.02                                                                    |
| 1.5                | 0.71             | 1.22                                                                    |
| 2.5                | 0.85             | 1.14                                                                    |
| 3.5                | 0.99             | 1.28                                                                    |
| 4.5                | 1.12             | 1.12                                                                    |
| 5.5                | 1.26             | 1.29                                                                    |
| 6.5                | 1.39             | 1.25                                                                    |
| 7.5                | 1.53             | 1.2                                                                     |
| 8.5                | 1.67             | 1.25                                                                    |
| 9.5                | 1.8              | 1.26                                                                    |
| 10.5               | 1.96             | 1.22                                                                    |
| 11.5               | 2.13             | 1.32                                                                    |
| 12.5               | 2.3              | 1.08                                                                    |
| 13.5               | 2.47             | 1.25                                                                    |
| 14.5               | 2.64             | 1.37                                                                    |
| 15.5               | 2.82             | 1.33                                                                    |
| 16.5               | 2.99             | 1.2                                                                     |
| 17.5               | 3.16             | 1.19                                                                    |
| 18.5               | 3.33             | 1.13                                                                    |
| 19.5               | 3.5              | 1.24                                                                    |
| 20.5               | 3.68             | 1.26                                                                    |
| 21.5               | 3.87             | 1.22                                                                    |
| 22.5               | 4.06             | 1.3                                                                     |
| 23.5               | 4.25             | 1.19                                                                    |
| 24.5               | 4.44             | 1.1                                                                     |
| 25.5               | 4.62             | 1.17                                                                    |
| 26.5               | 4.81             | 1.07                                                                    |
| 27.5               | 5                | 1                                                                       |
| 28.5               | 5.19             | 1.23                                                                    |
| 29.5               | 5.38             | 1.11                                                                    |

|      |      |      |
|------|------|------|
| 30.5 | 5.52 | 1.26 |
| 31.5 | 5.63 | 1.25 |
| 32.5 | 5.74 | 1.29 |
| 33.5 | 5.85 | 1.22 |
| 34.5 | 5.96 | 1.11 |
| 35.5 | 6.07 | 0.94 |
| 36.5 | 6.18 | 1.17 |
| 37.5 | 6.29 | 1.1  |
| 38.5 | 6.4  | 1.22 |
| 39.5 | 6.51 | 1.13 |
| 40.5 | 6.64 | 1.11 |
| 41.5 | 6.79 | 1.17 |
| 42.5 | 6.94 | 1.16 |
| 43.5 | 7.09 | 0.85 |
| 44.5 | 7.24 | 1.09 |
| 45.5 | 7.39 | 1.23 |
| 46.5 | 7.54 | 1.06 |
| 47.5 | 7.69 | 0.9  |
| 48.5 | 7.84 | 1.07 |
| 49.5 | 7.99 | 1.06 |
| 50.5 | 8.14 | 1.05 |
| 51.5 | 8.29 | 1.05 |
| 52.5 | 8.44 | 1.12 |
| 53.5 | 8.59 | 1.04 |
| 54.5 | 8.74 | 1.1  |
| 55.5 | 8.88 | 0.89 |
| 56.5 | 9    | 1.05 |
| 57.5 | 9.13 | 1.05 |
| 58.5 | 9.25 | 1.09 |
| 59.5 | 9.37 | 1    |
| 60.5 | 9.49 | 1.19 |
| 61.5 | 9.61 | 0.89 |
| 62.5 | 9.74 | 0.75 |
| 63.5 | 9.86 | 0.7  |

|      |       |      |
|------|-------|------|
| 64.5 | 9.98  | 0.76 |
| 65.5 | 10.1  | 0.65 |
| 66.5 | 10.22 |      |
| 67.5 | 10.35 |      |
| 68.5 | 10.47 |      |
| 69.5 | 10.59 |      |
| 70.5 | 10.74 |      |
| 71.5 | 10.92 |      |
| 72.5 | 11.1  |      |
| 73.5 | 11.28 |      |
| 74.5 | 11.46 |      |
| 75.5 | 11.64 |      |
| 76.5 | 11.82 |      |
| 77.5 | 12.01 |      |
| 78.5 | 12.19 |      |
| 79.5 | 12.37 |      |
| 80.5 | 12.55 |      |
| 81.5 | 12.73 |      |
| 82.5 | 12.91 |      |
| 83.5 | 13.09 |      |
| 84.5 | 13.27 |      |
| 85.5 | 13.41 |      |
| 86.5 | 13.51 |      |
| 87.5 | 13.61 |      |
| 88.5 | 13.71 |      |
| 89.5 | 13.8  |      |
| 90.5 | 13.9  |      |
| 91.5 | 14    |      |
| 92.5 | 14.1  |      |
| 93.5 | 14.2  |      |
| 94.5 | 14.3  |      |
| 95.5 | 14.4  |      |
| 96.5 | 14.49 |      |
| 97.5 | 14.59 |      |

|       |       |
|-------|-------|
| 98.5  | 14.69 |
| 99.5  | 14.79 |
| 100.5 | 14.9  |
| 101.5 | 15.01 |
| 102.5 | 15.12 |
| 103.5 | 15.24 |
| 104.5 | 15.35 |
| 105.5 | 15.46 |
| 106.5 | 15.58 |
| 107.5 | 15.69 |
| 108.5 | 15.81 |
| 109.5 | 15.92 |
| 110.5 | 16.03 |
| 111.5 | 16.15 |
| 112.5 | 16.26 |
| 113.5 | 16.37 |
| 114.5 | 16.49 |
| 115.5 | 16.6  |
| 116.5 | 16.71 |
| 117.5 | 16.83 |
| 118.5 | 16.94 |
| 119.5 | 17.06 |
| 120.5 | 17.17 |
| 121.5 | 17.28 |
| 122.5 | 17.4  |
| 123.5 | 17.51 |
| 124.5 | 17.62 |
| 125.5 | 17.72 |
| 126.5 | 17.8  |
| 127.5 | 17.88 |
| 128.5 | 17.96 |
| 129.5 | 18.04 |
| 130.5 | 18.12 |
| 131.5 | 18.2  |



|       |       |
|-------|-------|
| 132.5 | 18.28 |
| 133.5 | 18.36 |
| 134.5 | 18.44 |
| 135.5 | 18.52 |
| 136.5 | 18.6  |
| 137.5 | 18.68 |
| 138.5 | 18.75 |
| 139.5 | 18.83 |
| 140.5 | 18.91 |
| 141.5 | 18.99 |
| 142.5 | 19.07 |
| 143.5 | 19.15 |
| 144.5 | 19.23 |
| 145.5 | 19.31 |
| 146.5 | 19.39 |
| 147.5 | 19.47 |
| 148.5 | 19.55 |
| 149.5 | 19.63 |
| 150.5 | 19.71 |
| 151.5 | 19.79 |
| 152.5 | 19.87 |
| 153.5 | 19.95 |
| 154.5 | 20.04 |
| 155.5 | 20.12 |
| 156.5 | 20.2  |
| 157.5 | 20.28 |
| 158.5 | 20.36 |
| 159.5 | 20.44 |
| 160.5 | 20.52 |
| 161.5 | 20.6  |
| 162.5 | 20.69 |
| 163.5 | 20.77 |
| 164.5 | 20.85 |
| 165.5 | 20.93 |

|       |       |
|-------|-------|
| 166.5 | 21.01 |
| 167.5 | 21.09 |
| 168.5 | 21.17 |
| 169.5 | 21.25 |
| 171.5 | 21.42 |
| 175.5 | 21.74 |
| 176.5 | 21.83 |
| 177.5 | 21.92 |
| 178.5 | 22    |
| 179.5 | 22.09 |
| 180.5 | 22.18 |
| 181.5 | 22.26 |
| 182.5 | 22.35 |
| 183.5 | 22.44 |
| 184.5 | 22.52 |
| 185.5 | 22.61 |
| 186.5 | 22.7  |
| 187.5 | 22.79 |
| 188.5 | 22.87 |
| 189.5 | 22.96 |
| 190.5 | 23.05 |
| 191.5 | 23.13 |
| 192.5 | 23.22 |
| 193.5 | 23.31 |
| 194.5 | 23.39 |
| 195.5 | 23.48 |
| 196.5 | 23.57 |
| 197.5 | 23.65 |
| 198.5 | 23.74 |
| 199.5 | 23.83 |
| 200.5 | 23.91 |
| 201.5 | 23.98 |
| 202.5 | 24.06 |
| 203.5 | 24.13 |

|       |       |
|-------|-------|
| 204.5 | 24.2  |
| 205.5 | 24.28 |
| 206.5 | 24.35 |
| 207.5 | 24.43 |
| 208.5 | 24.5  |
| 209.5 | 24.57 |
| 210.5 | 24.65 |
| 211.5 | 24.72 |
| 212.5 | 24.8  |
| 213.5 | 24.87 |
| 214.5 | 24.94 |
| 215.5 | 25.02 |
| 216.5 | 25.09 |
| 217.5 | 25.17 |
| 218.5 | 25.24 |
| 219.5 | 25.31 |
| 220.5 | 25.39 |
| 221.5 | 25.46 |
| 222.5 | 25.54 |
| 223.5 | 25.61 |
| 224.5 | 25.68 |
| 225.5 | 25.8  |
| 226.5 | 25.95 |
| 227.5 | 26.11 |
| 228.5 | 26.26 |
| 229.5 | 26.41 |
| 230.5 | 26.57 |
| 231.5 | 26.72 |
| 232.5 | 26.88 |
| 233.5 | 27.03 |
| 234.5 | 27.19 |
| 235.5 | 27.34 |
| 236.5 | 27.5  |
| 237.5 | 27.65 |

|       |       |
|-------|-------|
| 238.5 | 27.8  |
| 239.5 | 27.96 |
| 240.5 | 28.11 |
| 241.5 | 28.27 |
| 242.5 | 28.42 |
| 244.5 | 28.73 |
| 245.5 | 28.89 |
| 247.5 | 29.19 |
| 248.5 | 29.35 |
| 249.5 | 29.5  |
| 250.5 | 29.6  |
| 251.5 | 29.64 |
| 252.5 | 29.69 |
| 253.5 | 29.73 |
| 254.5 | 29.77 |
| 255.5 | 29.82 |
| 256.5 | 29.86 |
| 257.5 | 29.9  |
| 258.5 | 29.95 |
| 259.5 | 29.99 |
| 260.5 | 30.03 |
| 261.5 | 30.08 |
| 262.5 | 30.12 |
| 263.5 | 30.16 |
| 264.5 | 30.21 |
| 265.5 | 30.25 |
| 266.5 | 30.29 |
| 267.5 | 30.34 |
| 268.5 | 30.38 |
| 269.5 | 30.42 |
| 270.5 | 30.47 |
| 271.5 | 30.51 |
| 272.5 | 30.55 |
| 273.5 | 30.6  |

|       |       |       |
|-------|-------|-------|
| 274.5 | 30.64 |       |
| 275.5 | 30.7  |       |
| 276.5 | 30.79 | 0.32  |
| 277.5 | 30.88 |       |
| 278.5 | 30.97 | 0.33  |
| 279.5 | 31.06 |       |
| 280.5 | 31.15 | 0.24  |
| 281.5 | 31.24 |       |
| 282.5 | 31.33 | 0.3   |
| 283.5 | 31.42 | 0.35  |
| 284.5 | 31.51 | 0.29  |
| 285.5 | 31.6  | 0.25  |
| 286.5 | 31.69 | 0.29  |
| 287.5 | 31.78 | 0.28  |
| 288.5 | 31.86 | 0.25  |
| 289.5 | 31.95 | 0.19  |
| 290.5 | 32.04 | 0.17  |
| 291.5 | 32.13 | -0.22 |
| 292.5 | 32.22 | -0.17 |
| 293.5 | 32.31 | 0.03  |
| 294.5 | 32.4  | -0.05 |
| 295.5 | 32.49 | 0.05  |
| 296.5 | 32.58 | 0.15  |
| 297.5 | 32.67 | 0.03  |
| 298.5 | 32.76 | 0.34  |
| 299.5 | 32.85 |       |
| 300.5 | 32.96 | 0.28  |
| 301.5 | 33.11 |       |
| 302.5 | 33.25 | 0.27  |
| 303.5 | 33.4  |       |
| 304.5 | 33.54 | 0.43  |
| 305.5 | 33.68 | 0.36  |
| 306.5 | 33.83 | 0.3   |
| 307.5 | 33.97 | 0.17  |

|       |       |      |
|-------|-------|------|
| 308.5 | 34.12 | 0.36 |
| 309.5 | 34.26 | 0.49 |
| 310.5 | 34.41 | 0.38 |
| 311.5 | 34.55 | 0.39 |
| 312.5 | 34.7  | 0.26 |
| 313.5 | 34.84 | 0.3  |
| 314.5 | 34.98 | 0.42 |
| 315.5 | 35.13 | 0.39 |
| 316.5 | 35.27 |      |
| 317.5 | 35.42 | 0.2  |
| 318.5 | 35.56 | 0.3  |
| 319.5 | 35.71 | 0.4  |
| 320.5 | 35.85 | 0.33 |
| 321.5 | 35.99 | 0.39 |
| 322.5 | 36.14 | 0.5  |
| 323.5 | 36.28 | 0.4  |
| 324.5 | 36.43 | 0.4  |
| 325.5 | 36.57 | 0.42 |
| 326.5 | 36.72 | 0.42 |
| 327.5 | 36.87 | 0.47 |
| 328.5 | 37.02 | 0.43 |
| 329.5 | 37.16 | 0.45 |
| 330.5 | 37.31 | 0.36 |
| 331.5 | 37.46 | 0.47 |
| 332.5 | 37.6  | 0.51 |
| 333.5 | 37.75 | 0.41 |
| 334.5 | 37.9  |      |
| 335.5 | 38.05 | 0.34 |
| 336.5 | 38.19 | 0.4  |
| 337.5 | 38.34 | 0.44 |
| 338.5 | 38.49 | 0.39 |
| 339.5 | 38.63 | 0.3  |
| 340.5 | 38.78 | 0.29 |
| 341.5 | 38.93 | 0.37 |

|       |       |      |
|-------|-------|------|
| 342.5 | 39.08 | 0.39 |
| 343.5 | 39.22 | 0.4  |
| 344.5 | 39.37 | 0.35 |
| 345.5 | 39.52 | 0.28 |
| 346.5 | 39.67 | 0.32 |
| 347.5 | 39.81 | 0.34 |
| 348.5 | 39.96 | 0.25 |
| 349.5 | 40.11 | 0.43 |
| 350.5 | 40.25 | 0.25 |
| 351.5 | 40.4  |      |
| 352.5 | 40.55 |      |
| 353.5 | 40.7  | 0.22 |
| 354.5 | 40.84 | 0.35 |
| 355.5 | 40.99 | 0.47 |
| 356.5 | 41.14 | 0.43 |
| 357.5 | 41.28 | 0.47 |
| 358.5 | 41.43 | 0.28 |
| 359.5 | 41.58 | 0.2  |
| 360.5 | 41.73 | 0.2  |
| 361.5 | 41.87 | 0.3  |
| 362.5 | 42    | 0.3  |
| 363.5 | 42.14 | 0.47 |
| 364.5 | 42.28 | 0.7  |
| 365.5 | 42.41 | 0.54 |
| 366.5 | 42.55 | 0.56 |
| 367.5 | 42.68 | 0.58 |
| 368.5 | 42.82 | 0.55 |
| 369.5 | 42.95 | 0.58 |
| 370.5 | 43.09 | 0.44 |
| 371.5 | 43.23 | 0.4  |
| 372.5 | 43.36 | 0.4  |
| 373.5 | 43.5  |      |
| 374.5 | 43.63 | 0.38 |
| 375.5 | 43.77 |      |

|       |       |       |
|-------|-------|-------|
| 376.5 | 43.9  | 0.43  |
| 377.5 | 44.04 | 0.45  |
| 378.5 | 44.18 | 0.47  |
| 379.5 | 44.31 | 0.44  |
| 380.5 | 44.45 | 0.57  |
| 381.5 | 44.58 | 0.54  |
| 382.5 | 44.72 | 0.45  |
| 383.5 | 44.85 | 0.48  |
| 384.5 | 44.99 | 0.74  |
| 385.5 | 45.13 | 0.37  |
| 386.5 | 45.26 | 0.42  |
| 387.5 | 45.4  | 0.49  |
| 388.5 | 45.53 | 0.63  |
| 389.5 | 45.67 | 0.53  |
| 390.5 | 45.8  | 0.42  |
| 391.5 | 45.94 | 0.43  |
| 392.5 | 46.08 | 0.15  |
| 393.5 | 46.21 | -0.47 |
| 394.5 | 46.35 | 0.42  |
| 395.5 | 46.48 | 0.52  |
| 396.5 | 46.62 | 0.34  |
| 397.5 | 46.75 | 0.5   |
| 398.5 | 46.89 | 0.34  |
| 399.5 | 47.03 | 0.44  |
| 400.5 | 47.16 | 0.93  |
| 401.5 | 47.3  |       |
| 402.5 | 47.43 | 0.25  |
| 403.5 | 47.57 | 0.29  |
| 404.5 | 47.7  | 0.34  |
| 405.5 | 47.84 | 0.55  |
| 406.5 | 47.98 | 0.43  |
| 407.5 | 48.11 | 0.45  |
| 408.5 | 48.25 | 0.37  |
| 409.5 | 48.38 | 0.5   |



|       |       |      |
|-------|-------|------|
| 410.5 | 48.52 | 0.58 |
| 411.5 | 48.65 | 0.5  |
| 412.5 | 48.79 | 0.6  |
| 413.5 | 48.93 | 0.25 |
| 414.5 | 49.06 | 0.48 |
| 415.5 | 49.2  | 0.38 |
| 416.5 | 49.33 | 0.56 |
| 417.5 | 49.48 | 0.27 |
| 418.5 | 49.65 | 0.55 |
| 419.5 | 49.82 | 0.64 |
| 420.5 | 49.98 | 0.08 |
| 421.5 | 50.15 | 0.57 |
| 422.5 | 50.32 | 0.62 |
| 423.5 | 50.49 | 0.81 |
| 424.5 | 50.65 | 0.22 |
| 425.5 | 50.82 | 0.63 |
| 426.5 | 50.99 | 0.58 |
| 427.5 | 51.15 |      |
| 428.5 | 51.32 |      |
| 429.5 | 51.49 | 0.3  |
| 430.5 | 51.65 | 0.31 |
| 431.5 | 51.82 | 0.25 |
| 432.5 | 51.99 | 0.32 |
| 433.5 | 52.16 | 0.44 |
| 434.5 | 52.32 | 0.08 |
| 435.5 | 52.49 | 0.38 |
| 436.5 | 52.66 | 0.45 |
| 437.5 | 52.82 | 0.33 |
| 438.5 | 52.99 | 0.39 |
| 439.5 | 53.16 | 0.37 |
| 440.5 | 53.32 | 0.55 |
| 441.5 | 53.49 | 0.44 |
| 442.5 | 53.66 | 0.39 |
| 443.5 | 53.83 | 0.47 |

|       |       |       |
|-------|-------|-------|
| 444.5 | 53.99 | 0.45  |
| 445.5 | 54.16 | 0.41  |
| 446.5 | 54.33 | 0.36  |
| 447.5 | 54.49 | 0.53  |
| 448.5 | 54.66 | 0.62  |
| 449.5 | 54.83 | 0.24  |
| 450.5 | 54.99 | 0.42  |
| 451.5 | 55.16 | 0.4   |
| 452.5 | 55.33 | 0.54  |
| 453.5 | 55.5  | 0.63  |
| 454.5 | 55.66 | 0.46  |
| 455.5 | 55.83 | 0.1   |
| 456.5 | 56    | 0.23  |
| 457.5 | 56.16 | 0.25  |
| 458.5 | 56.33 | 0.23  |
| 459.5 | 56.5  | 0.19  |
| 460.5 | 56.66 | 0.32  |
| 461.5 | 56.83 | 0.23  |
| 462.5 | 57    | 0.32  |
| 463.5 | 57.17 | 0.2   |
| 464.5 | 57.33 | -0.14 |
| 465.5 | 57.5  | -0.02 |
| 466.5 | 57.67 | 0.2   |
| 467.5 | 57.83 | -0.5  |
| 468.5 | 58    | -0.42 |
| 469.5 | 58.17 | -0.15 |
| 470.5 | 58.33 | -0.26 |
| 471.5 | 58.5  | 0.12  |
| 472.5 | 58.67 | 0.13  |
| 473.5 | 58.84 | -0.04 |
| 474.5 | 59    | 0.21  |
| 475.5 | 59.17 | 0.34  |
| 476.5 | 59.34 | 0.1   |
| 477.5 | 59.5  | 0.14  |

|       |       |       |
|-------|-------|-------|
| 478.5 | 59.67 | 0.24  |
| 479.5 | 59.84 | 0.09  |
| 480.5 | 60    | 0.34  |
| 481.5 | 60.17 | 0.22  |
| 482.5 | 60.34 | 0.37  |
| 483.5 | 60.51 | 0.22  |
| 484.5 | 60.67 | 0.2   |
| 485.5 | 60.84 | 0.21  |
| 486.5 | 61.01 | -0.04 |
| 487.5 | 61.17 | 0.28  |
| 488.5 | 61.34 | 0.41  |
| 489.5 | 61.51 | 0.15  |
| 490.5 | 61.67 | 0.28  |
| 491.5 | 61.84 | 0.3   |
| 492.5 | 62.01 | 0.27  |
| 493.5 | 62.18 | 0.51  |
| 494.5 | 62.34 | 0.41  |
| 495.5 | 62.51 | 0.4   |
| 496.5 | 62.68 | -0.01 |
| 497.5 | 62.84 | 0.33  |
| 498.5 | 63.01 | 0.32  |
| 499.5 | 63.18 | 0.64  |
| 500.5 | 63.34 | 0.76  |
| 501.5 | 63.51 | 0.53  |
| 503.5 | 63.85 | 0.66  |
| 504.5 | 64.01 | 0.49  |
| 505.5 | 64.18 | 0.65  |
| 506.5 | 64.35 | 0.62  |
| 507.5 | 64.51 | 0.79  |
| 508.5 | 64.68 | 0.74  |
| 509.5 | 64.85 | 0.66  |
| 510.5 | 65.01 | 0.71  |
| 511.5 | 65.18 | 0.75  |
| 512.5 | 65.35 | 0.62  |

|       |       |      |
|-------|-------|------|
| 513.5 | 65.52 | 0.6  |
| 514.5 | 65.68 | 0.79 |
| 515.5 | 65.85 | 0.78 |
| 516.5 | 66.02 | 0.86 |
| 517.5 | 66.18 | 0.89 |
| 519.5 | 66.52 | 0.91 |
| 521.5 | 66.85 | 0.83 |
| 523.5 | 67.19 | 0.75 |
| 525.5 | 67.52 | 0.82 |
| 527.5 | 67.85 | 0.81 |
| 529.5 | 68.19 | 0.81 |
| 531.5 | 68.52 | 0.73 |
| 533.5 | 68.86 | 0.68 |
| 535.5 | 69.19 |      |
| 537.5 | 69.52 | 0.64 |
| 539.5 | 69.86 | 0.63 |
| 541.5 | 70.19 | 0.5  |
| 543.5 | 70.53 | 0.62 |
| 545.5 | 70.86 | 0.61 |
| 546.5 | 71.03 |      |
| 547.5 | 71.19 |      |
| 549.5 | 71.53 |      |
| 551.5 | 71.86 | 0.86 |
| 553.5 | 72.2  | 1.16 |
| 555.5 | 72.53 | 1    |
| 557.5 | 72.86 | 0.79 |
| 559.5 | 73.2  | 0.92 |
| 561.5 | 73.53 | 0.63 |
| 563.5 | 73.87 | 1.09 |
| 565.5 | 74.2  | 0.78 |
| 567.5 | 74.53 | 0.9  |
| 569.5 | 74.87 | 0.7  |
| 571.5 | 75.2  | 0.86 |
| 573.5 | 75.54 | 0.88 |

|       |       |      |
|-------|-------|------|
| 575.5 | 75.87 | 0.83 |
| 577.5 | 76.2  | 0.75 |
| 579.5 | 76.54 | 0.8  |
| 581.5 | 76.87 |      |
| 583.5 | 77.21 | 1.11 |
| 585.5 | 77.54 | 1.14 |
| 587.5 | 77.87 | 1.36 |
| 589.5 | 78.21 | 1.28 |
| 591.5 | 78.54 | 1.03 |
| 593.5 | 78.88 | 1.18 |
| 595.5 | 79.21 | 0.97 |
| 597.5 | 79.54 | 0.9  |
| 599.5 | 79.88 | 0.85 |
| 601.5 | 80.21 | 0.81 |
| 605.5 | 80.88 | 0.8  |
| 609.5 | 81.55 | 0.7  |
| 613.5 | 82.22 | 0.69 |
| 617.5 | 82.88 | 0.72 |

---

## Supplement 2

**Figure S1** Composite stable carbon isotope records for the interval ~62–28 ka B.P. of KL11, representing the vital effect-corrected averages of *Cibicides mabahethi*, *Discorbinella bertheloti* s.l. and *Hanzawaia boueana* s.l. (blue line) while the orange line excludes *H. boueana*. The inclusion of *H. boueana* allows to complete the isotopic record along the MIS 3, especially with two samples where the two other species are absent. The composite record without *H. boueana* follows the same pattern and closely resembles the composite record with *H. boueana* included.

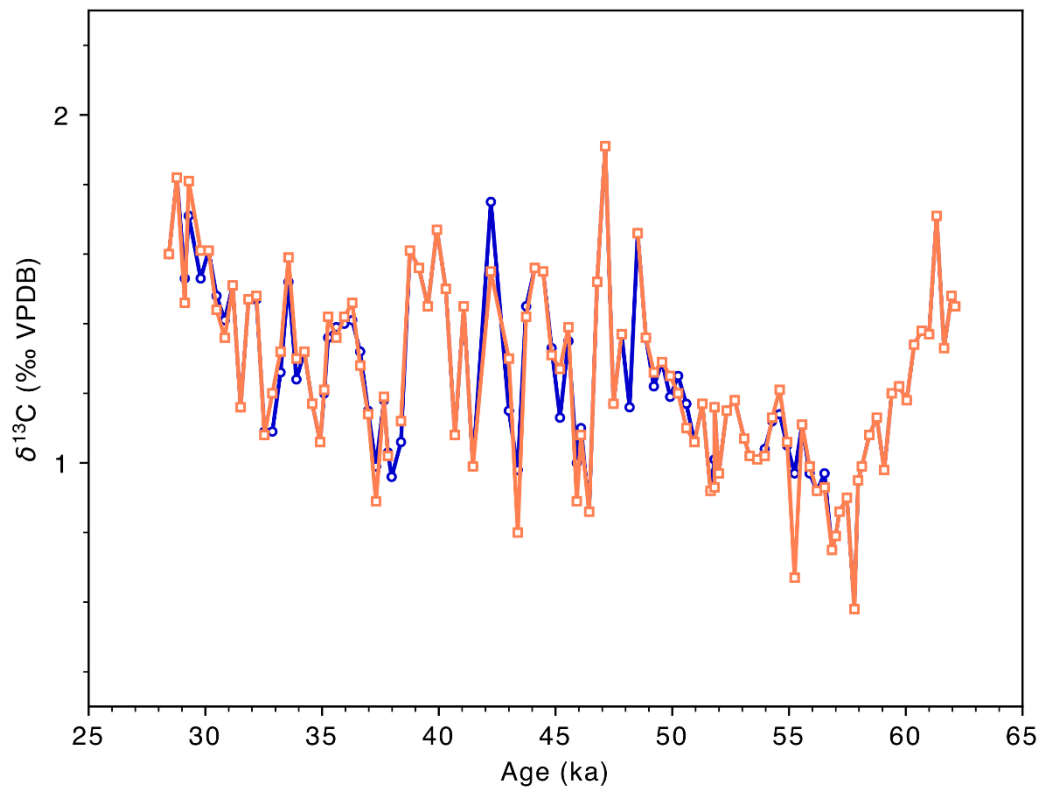

Supplement: Supplementary file 1 [file cp-20-267-2024-supplement.pdf]
